# Supplementary material for: Long-Term Self-Renewal of Human ES/iPS-Derived Hepatoblast-like Cells on Human Laminin 111-Coated Dishes
Source: PubMed Central journal article supplement — Stem Cell Reports. 2013 Oct 3;1(4):322–35. doi: 10.1016/j.stemcr.2013.08.006 (PMC3849256; doi:10.1016/j.stemcr.2013.08.006), 2013-10-03
Supplement: mmc1.pdf [file mmc1.pdf]

**Stem Cell Reports, Volume 1**

**Supplemental Information**

**Long-Term Self-Renewal of Human  
ES/iPS-Derived Hepatoblast-like Cells  
on Human Laminin 111-Coated Dishes**

**Kazuo Takayama, Yasuhito Nagamoto, Natsumi Mimura, Katsuhisa Tashiro, Fuminori Sakurai,  
Masashi Tachibana, Takao Hayakawa, Kenji Kawabata, and Hiroyuki Mizuguchi**

Supplemental figure 1

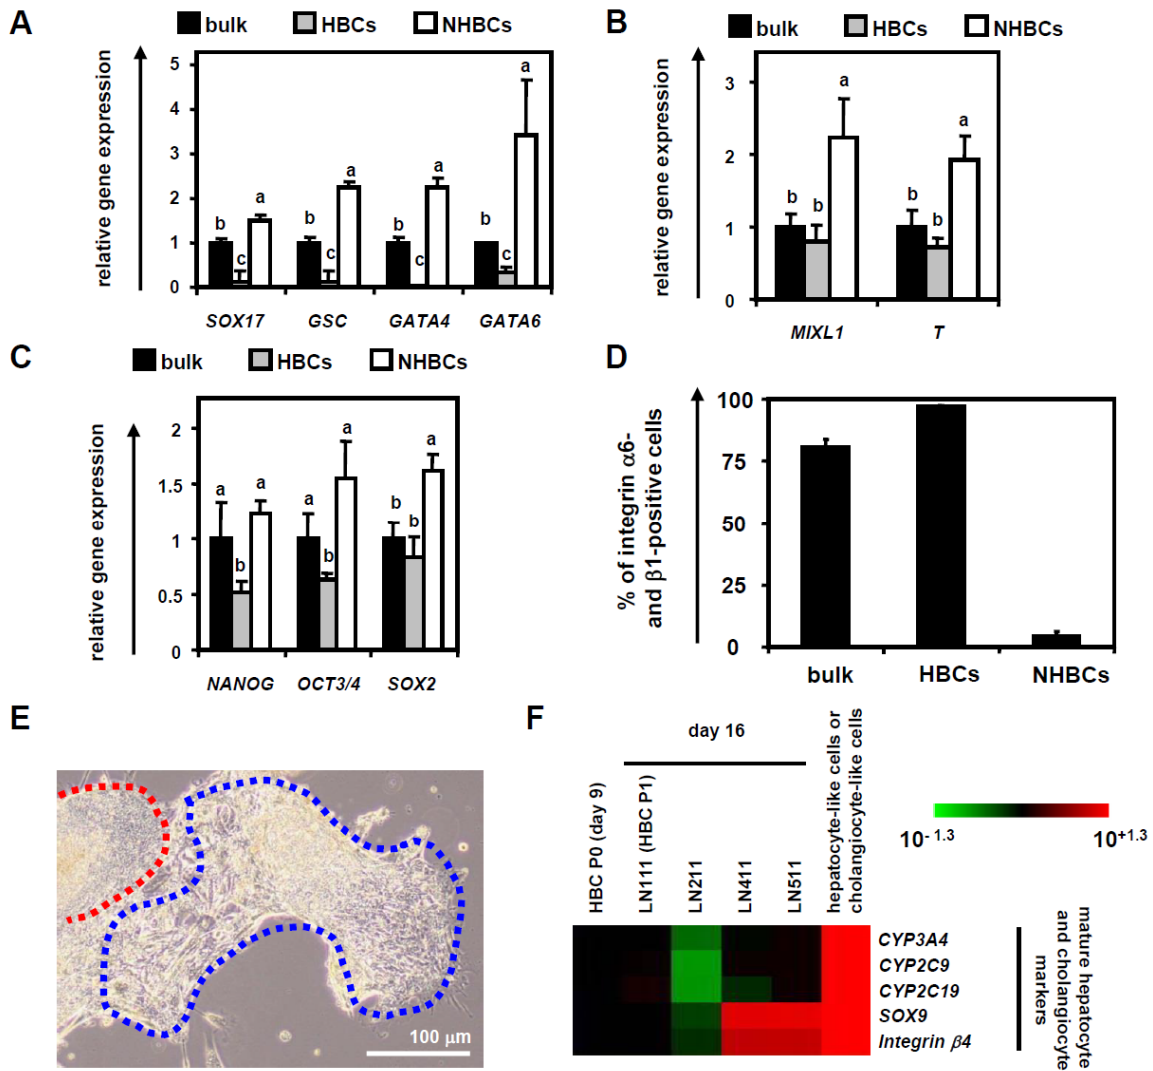

**Figure S1. The characterization and purification of the hESC-derived HBCs, Related to Figure 1**

(A-C) On day 9, the hESC (H9)-derived HBCs and NHBCs were manually picked up and pooled into groups, and the gene expression levels of (A) definitive endoderm markers (*SOX17*, *GSC*, *GATA4*, and *GATA6*), (B) mesoderm markers (*MIXL1* and *T*), and (C) pluripotent markers (*NANOG*, *OCT3/4*, and *SOX2*) were measured by real-time RT-PCR. The gene expression in the human ESC-derived cells (day 9; bulk) was taken as 1.0. Data represent the mean ± SD from three independent experiments. Statistical significance was evaluated by ANOVA followed by Bonferroni post-hoc tests to compare three groups (bulk, HBCs, and NHBCs). Groups that do not share the same letter are significantly different from each other ( $P < 0.05$ ). (D) The percentage of both integrin α6 and β1-double positive

cells was measured by using FACS analysis. Data represent the mean  $\pm$  SD from seven independent experiments. (E) The hESC -derived HBCs were manually picked up and passaged onto a LN111-coated dish, and then cultured for 3 days. Phase-contrast micrographs are shown. The cells indicated in red resembled human hepatic stem cells and the cells indicated in blue resembled human hepatoblasts (Schmelzer et al., 2007; Zhang et al., 2008). (F) The hESC-derived cells (day 9) were plated onto human LN111, 211, 411, or 511-coated dish. The gene expression levels of mature hepatocyte markers (*CYP3A4*, *2C9*, and *2C19*) or cholangiocyte markers (*SOX9* and *integrin  $\beta$ 4*) were measured by real-time RT-PCR on day 16. The gene expression levels in the hESC-derived HBCs (the LN111-attached cells were collected at 15 min from plating) were taken as 1.0. Data represent the mean  $\pm$  SD from three independent experiments. The gene expression levels of *SOX9* and *integrin  $\beta$ 4* in the cells on LN411 or LN511 coated dishes were significantly different from other three groups (HBC P0, LN111, and LN211) based on analysis with one-way ANOVA followed by Bonferroni post-hoc tests ( $P < 0.05$ ).

**A**

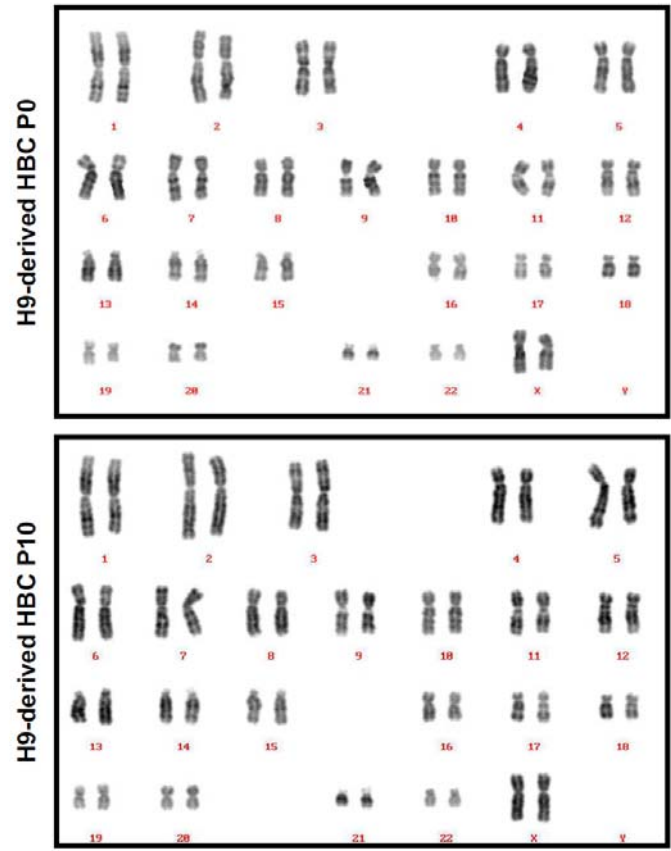

**B**

6 hr after passage on LN111

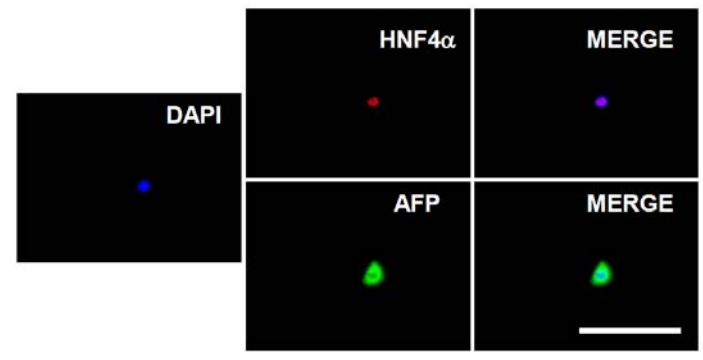

**C**

7 days after passage on LN111

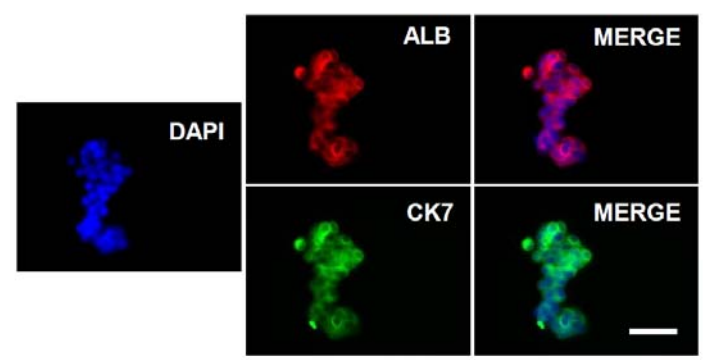

**Figure S2. Karyotype and colony formation capacity of the hESC-derived HBCs on a human LN111-coated dish, Related to Figure 3**

(A) Karyotypes of hESC (H9)-derived HBC P0 and HBC P10 are shown, respectively. Chromosomal Q-band analyses showed that the human ESC (H9)-derived HBC P0 and P10 had a normal karyotype, indicating that the genetic stability of the HBCs was confirmed throughout the maintenance period. (B) The single hESC (H9)-derived HBC was plated in separate wells of a human LN111-coated 96-well plate. After 6 hr of plating, the expression of AFP (green) and HNF4 $\alpha$  (red) were examined by immunohistochemistry. Nuclei were counterstained with DAPI (blue). Scale bar represents 20  $\mu$ m. (C) After 7 days of plating, the expression of ALB (red) and CK7 (green) in hESC-derived HBC colony were examined by immunohistochemistry. Nuclei were counterstained with DAPI (blue). Scale bar represents 20  $\mu$ m.

Supplemental figure 3

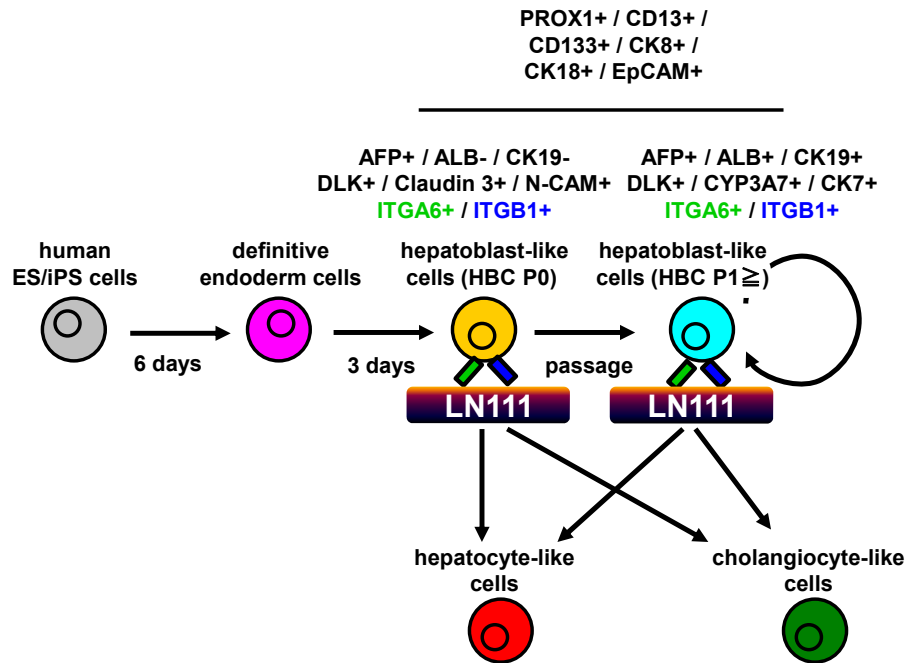

|                                                            | HBC P0                                                               | HBC P1                                                         | HBC P10                                                         | HBC clone                                            |
|------------------------------------------------------------|----------------------------------------------------------------------|----------------------------------------------------------------|-----------------------------------------------------------------|------------------------------------------------------|
|                                                            | hPSC-derived cells (day 9) which attached to human LN111-coated dish | HBCs which were cultured on human LN111-coated dish for 7 days | HBCs that were passaged to human LN111-coated dish for 10 times | HBCs which were derived from single hPSC-derived HBC |
| differentiation capacity into hepatocyte and cholangiocyte | bipotent                                                             | bipotent                                                       | bipotent                                                        | bipotent                                             |
| ability to integrate into liver parenchyma                 | +                                                                    | not examined                                                   | +                                                               | not examined                                         |
| average cell diameter                                      | 10 μm ≤                                                              | 10 μm ≥                                                        | 10 μm ≥                                                         | 10 μm ≥                                              |
| nucleus to cytoplasmic ratio                               | very high                                                            | intermediate                                                   | intermediate                                                    | intermediate                                         |
| self-renewal                                               | not succeeded                                                        | self-renewed on LN111                                          | self-renewed on LN111                                           | self-renewed on LN111                                |

**Figure S3. The characteristics of the hPSC-derived HBCs are summarized, Related to Figure 3**

The hPSC-derived HBCs exhibited the ability to differentiate into both hepatic and biliary lineages. Long-term culture of HBCs derived from human pluripotent stem cells could be performed. The definitions of the hPSC-derived HBC P0, P1, P10, and clone in the present study are summarized.

Supplemental figure 4

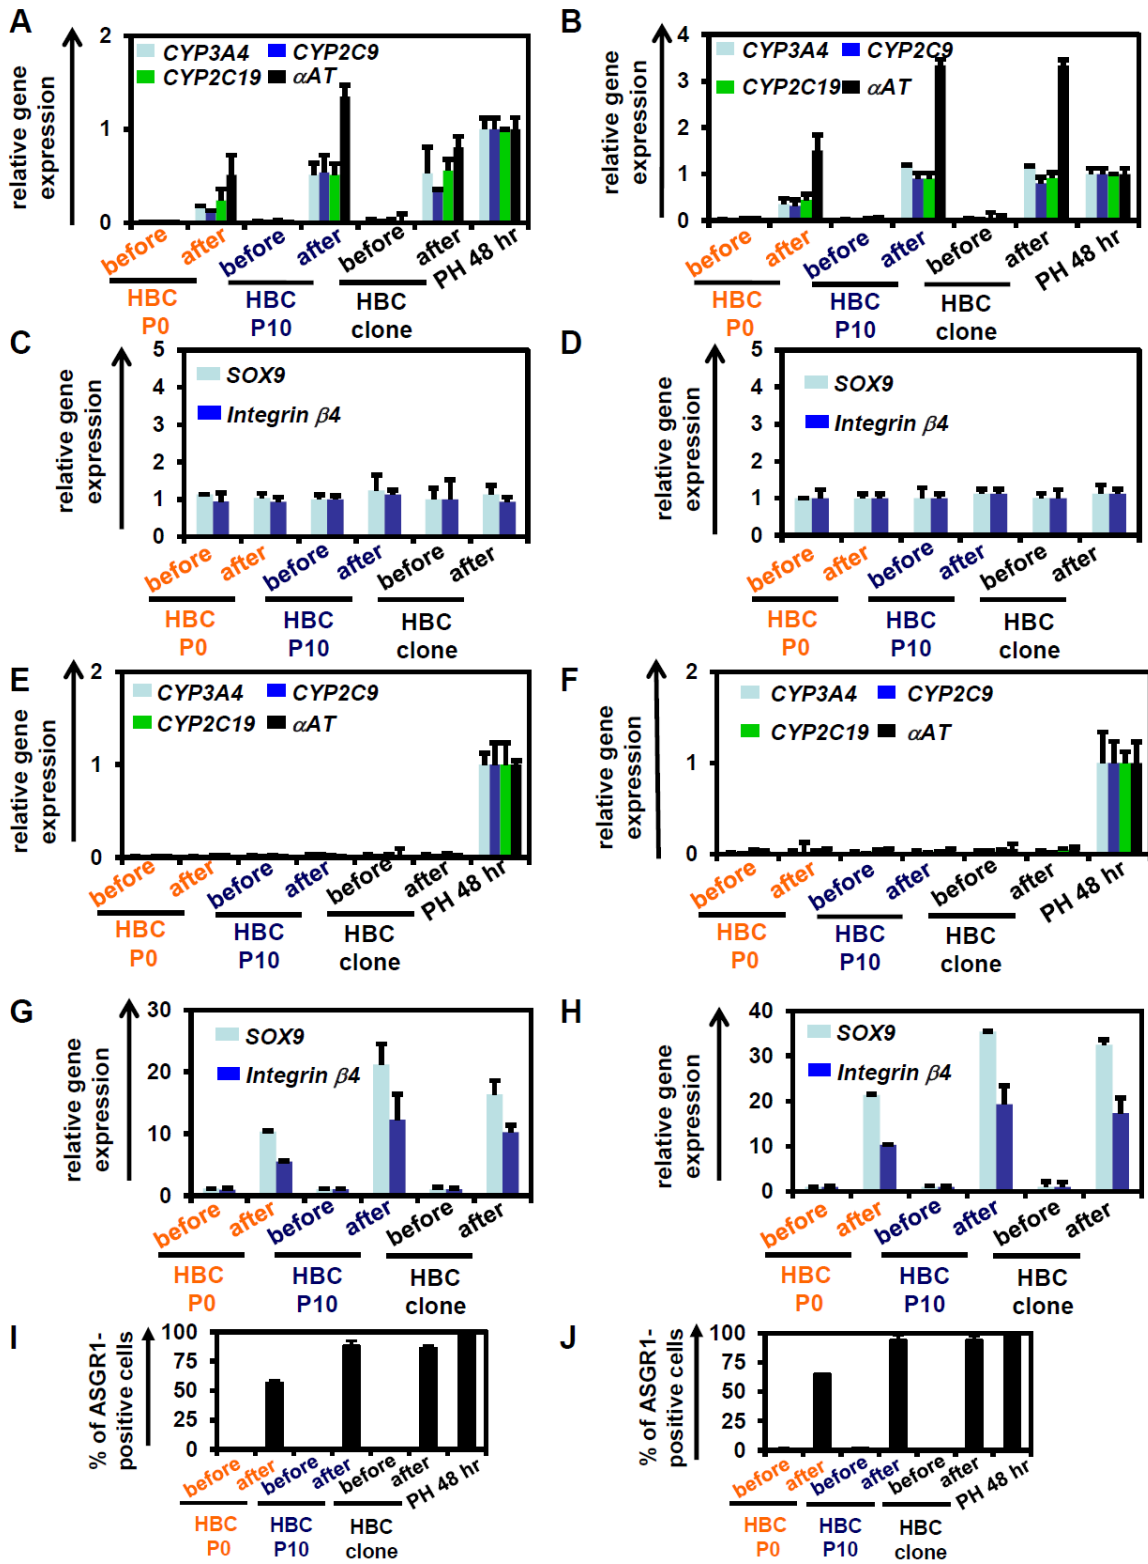

**Figure S4. Hepatocyte and cholangiocyte differentiation capacity of the hESC/iPSC-derived HBCs, Related to Figure 4**

(A-D) The hESC (H1 (A, C)) or hiPSC (Dotcom (B, D))-derived HBC P0, HBC P10, or HBC clone were differentiated into hepatocyte-like cells as described in **Figure 4A**. The gene expression levels of hepatocyte (*CYP3A4*, *2C9*, *2C19*, and *αAT*) (A, B) and cholangiocyte (*SOX9* and *integrin β4*) (C, D) markers in the HBC P0-, HBC P10-, or HBC clone-derived hepatocyte-like cells were measured by real-time RT-PCR after 14 days of differentiation. The gene expression levels of hepatocyte markers in PH 48hr were taken as 1.0 in **Figure S4A, B**. The gene expression levels of cholangiocyte markers in the hESC/hiPSC-derived HBC P10 (before hepatocyte differentiation) were taken as 1.0 in **Figure S4C, D**. Data represent the mean ± SD from three independent experiments. Student's *t* test indicated that gene expression levels of hepatocyte markers in “after” were significantly higher than those in “before” ( $P < 0.01$ ). (E-H) The hESC (H1 (E, G)) or hiPSC (Dotcom (F, H))-derived HBC P0, HBC P10, or HBC clone were differentiated into cholangiocyte-like cells as described in **Figure 4H**. The gene expression levels of hepatocyte (*CYP3A4*, *2C9*, *2C19*, and *αAT*) (E, F) and cholangiocyte (*SOX9* and *integrin β4*) (G, H) markers in the HBC P0-, HBC P10-, or HBC clone-derived cholangiocyte-like cells were measured by real-time RT-PCR after 14 days of differentiation. The gene expression levels of hepatocyte markers in PH 48hr were taken as 1.0 in **Figure S4E, F**. The gene expression levels of cholangiocyte markers in the hESC/hiPSC-derived HBC P10 (before cholangiocyte differentiation) were taken as 1.0 in **Figure S4G, H**. Data represent the mean ± SD from three independent experiments. Student's *t* test indicated that gene expression levels of cholangiocyte markers in “after” were significantly higher than those in “before” ( $P < 0.01$ ). (I, J) The efficiency of hepatocyte differentiation from the hESC (H1 (I)) or hiPSC (Dotcom (J))-derived HBC P0, HBC P10, or HBC clone was measured by estimating the percentage of ASGR1-positive cells using FACS analysis. Data represent the mean ± SD from three independent experiments. Student's *t* test indicated that percentage of ASGR1-positive cells in “after” were significantly higher than those in “before” ( $P < 0.01$ ). “Before” indicated the HBCs before hepatocyte or cholangiocyte differentiation; “After” indicated the HBCs after hepatocyte or cholangiocyte differentiation.



Supplemental figure 5

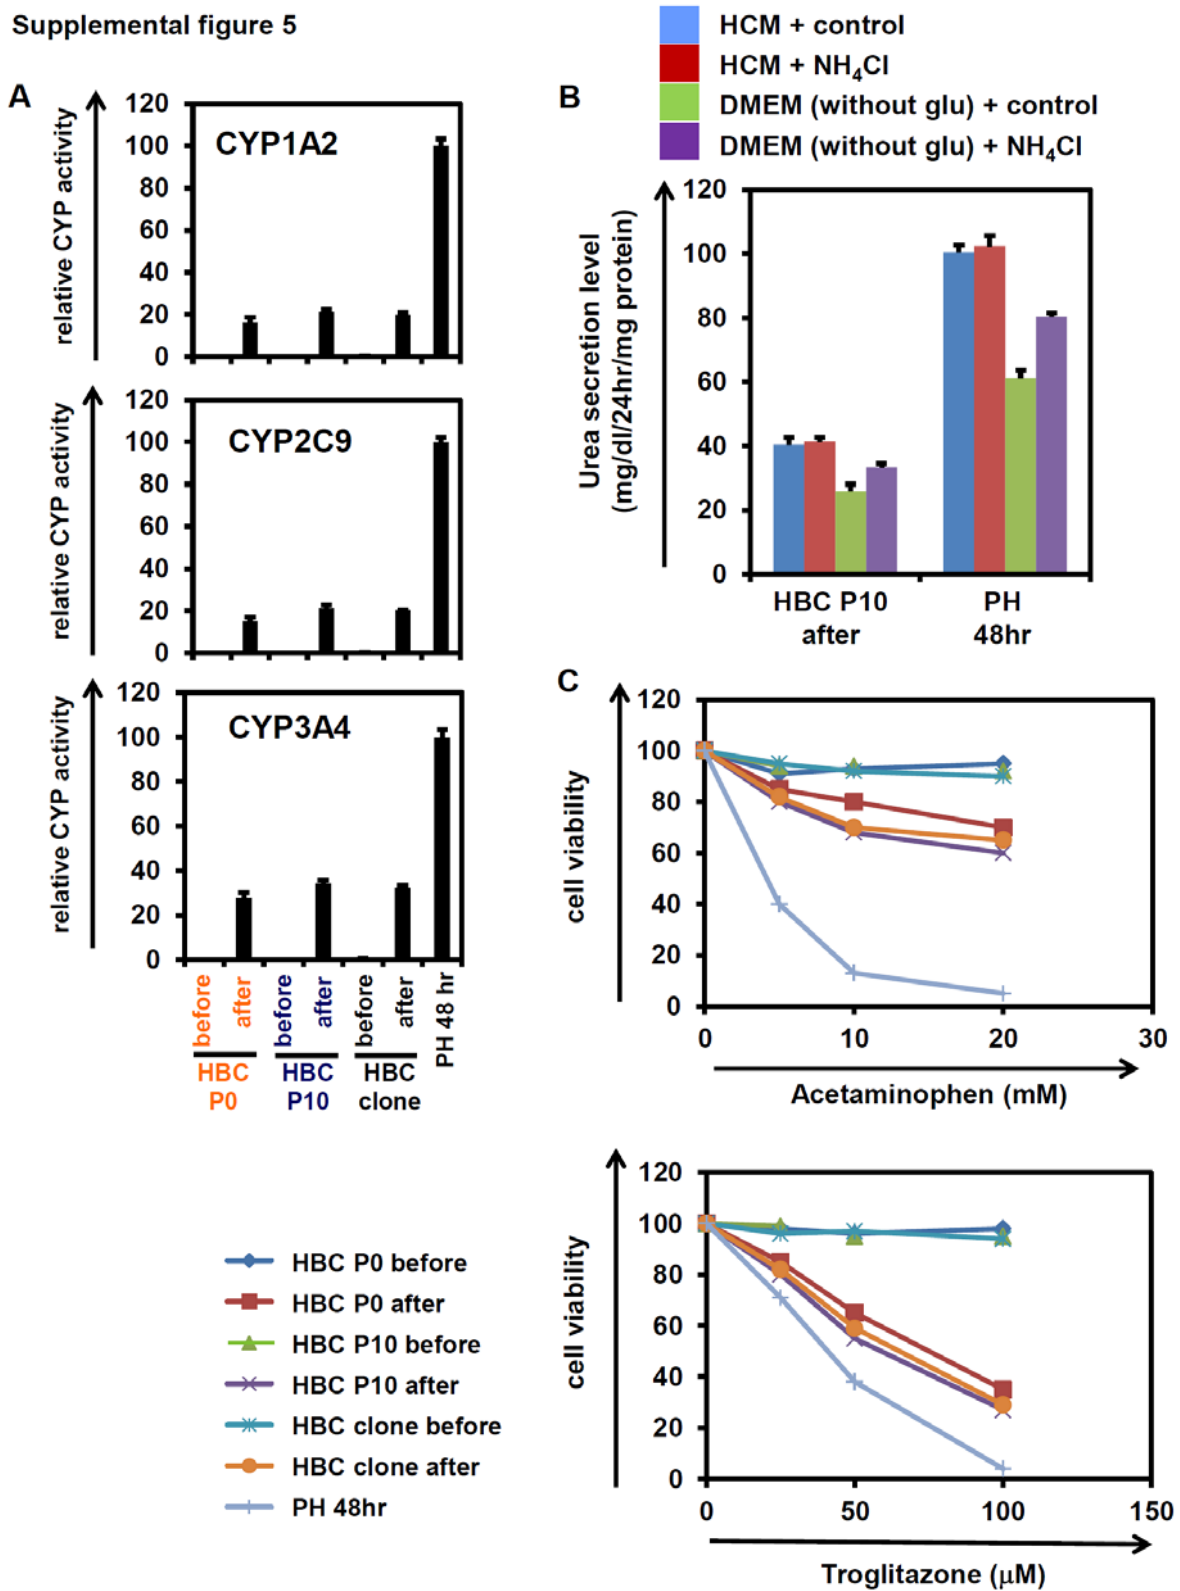

**Figure S5. CYP metabolism capacity, urea production ability, potential of drug screening application of the hESC-derived HBCs, Related to Figure 4**

(A) The hESC (H9)-derived HBC P0, HBC P10, or HBC clone were differentiated into hepatocyte-like cells as described in **Figure 4A**. The CYP1A2, 2C9, and 3A4 activity levels were measured after 14 days of hepatocyte differentiation. The CYP activity levels in PH 48hr were taken as 100. Data represent the mean  $\pm$  SD from three independent experiments. Student's *t* test indicated that the CYP activity in "after" were significantly higher than those in "before" ( $P < 0.01$ ). (B) The hESC (H9)-derived HBC P10 were differentiated into hepatocyte-like cells as described in **Figure 4A**. After 14 days of hepatocyte differentiation, the HBC-derived hepatocyte-like cells were cultured in HCM (contains glutamine) or DMEM (do not contain glutamine) in the presence or absence of 1 mM ammonium chloride ( $\text{NH}_4\text{Cl}$ ) for 24 hr, and then the amount of urea secretion was measured. PH 48hr were also cultured in HCM (containing glutamine) or DMEM (not containing glutamine) in the presence or absence of 1 mM ammonium chloride ( $\text{NH}_4\text{Cl}$ ) for 24 hr, and then the amount of urea secretion was measured. Data represent the mean  $\pm$  SD from three independent experiments. Student's *t* test indicated that the urea secretion levels in the "DMEM (without glu) +  $\text{NH}_4\text{Cl}$ " were significantly higher than those in the "DMEM (without glu) + control" ( $P < 0.05$ ). (C) The cell viability of HBC P0 before, HBC P0 after, HBC P10 before, HBC P10 after, HBC clone before, HBC clone after, and PH 48hr was assessed by WST-8 assay after 48 hr exposure to different concentrations of acetaminophen and troglitazone. The susceptibility of the HBC was higher than that of the HBC before. The cell viability was expressed as a percentage of that in the cells treated only with solvent. These data are representative of two independent experiments. "Before" indicated the HBCs before hepatocyte or cholangiocyte differentiation; "After" indicated the HBCs after hepatocyte or cholangiocyte differentiation.

**Table S1. The colony formation capacity of the hESC-derived HBCs on various laminins was examined, Related to Figure 4**

| human recombinant laminin | ALB+ / CK7+ | ALB+ / CK7- | ALB- / CK7+ |
|---------------------------|-------------|-------------|-------------|
| LN111                     | 12          | 0           | 0           |
| LN211                     | 6           | 1           | 2           |
| LN411                     | 1           | 3           | 26          |
| LN511                     | 2           | 5           | 25          |

The colonies were separated into three groups based on the expression of albumin and CK7. The numbers represent total colony counts in ten 96-well plates. At 7 days after plating, the cells were fixed in 4% paraformaldehyde and used for double immunostaining. Data are representative of three independent experiments. The efficacy of the cloning on human LN11-coated dishes was approximately 0.1%.

**Table S2. The primary antibodies used in this study, Related to Figures 1–5**

| antigen                                   | type   | company                  |
|-------------------------------------------|--------|--------------------------|
| Alpha-1-fetoprotein                       | rabbit | DAKO                     |
| integrin $\alpha$ 6                       | mouse  | BioLegend                |
| integrin $\beta$ 1 (for inhibition assay) | mouse  | abcam                    |
| integrin $\beta$ 1 (for FACS)             | rabbit | Bethyl Laboratories      |
| CK7                                       | mouse  | Invitrogen               |
| CK19                                      | mouse  | Invitrogen               |
| ALB                                       | goat   | Bethyl Laboratories      |
| CYP3A4                                    | goat   | Santa Cruz Biotechnology |
| ASGR1                                     | goat   | Santa Cruz Biotechnology |
| $\alpha$ AT                               | rabbit | DAKO                     |
| HNF4 $\alpha$                             | goat   | Santa Cruz Biotechnology |
| control IgG                               | rabbit | Santa Cruz Biotechnology |
| control IgG                               | mouse  | Santa Cruz Biotechnology |
| control IgG                               | goat   | Santa Cruz Biotechnology |

**Table S3. The secondary antibodies used in this study, Related to Figures 1–5**

| antigen    | type            | company          |
|------------|-----------------|------------------|
| rabbit IgG | alexa fluor 594 | Molecular Probes |
| rabbit IgG | alexa fluor 488 | Molecular Probes |
| mouse IgG  | alexa fluor 594 | Molecular Probes |
| mouse IgG  | alexa fluor 488 | Molecular Probes |
| goat IgG   | alexa fluor 594 | Molecular Probes |
| goat IgG   | alexa fluor 488 | Molecular Probes |

**Table S4. The primers used for real-time RT-PCR in this study, Related to Figures 1, 3, and 4**

| Gene Symbol         | Primers (forward/reverse; 5' to 3')             |
|---------------------|-------------------------------------------------|
| AFP                 | TGGGACCCGAACTTTCCA/GGCCACATCCAGGACTAGTTTC       |
| ALB                 | GCACAGAATCCTTGGTGAACAG/ATGGAAGGTGAATGTTTTTCAGCA |
| CD13                | GACCAAAGTAAAGCGTGGAATCG/TCTCAGCGTCACCCGGTAG     |
| CD133               | AGTCGGAAACTGGCAGATAGC/GGTAGTGTGTACTGGGCCAAT     |
| CK18                | GGGCCCAATATGACGAGCTG/AGCAGGATCCCGTTGAGCTG       |
| CK19                | CTCCCGCGACTACAGCCACT/TCAGCTCATCCAGCACCCCTG      |
| CK7                 | AGACGGAGTTGACAGAGCTG/GGATGGCCCGGTTTCATCTC       |
| CK8                 | TGAGGTCAAGGCACAGTACG/TGATGTTCCGGTTCATCTCA       |
| claudin 3           | AACACCATTATCCGGGACTTCT/GCGGAGTAGACGACCTTGG      |
| CYP2C19             | ACTTGGAGCTGGGACAGAGA/CATCTGTGTAGGGCATGTGG       |
| CYP2C9              | GGACAGAGACGACAAGCACA/CATCTGTGTAGGGCATGTGG       |
| CYP3A4              | AGATGCCTTTAGGTCCAATGGG/GCTGGAGATAGCAATGTTTCGT   |
| CYP3A7              | AAGGTCGCCTCAAAGAGACA/TGCACTTTCTGCTGGACATC       |
| CYP7A1              | GAGAAGGCAAACGGGTGAAC/GCACAACACCTTATGGTATGACA    |
| DLK1                | AGCATTATAGAGGCCATCG/CAGTGCATTTGCACCGAC          |
| EpCAM               | AATCGTCAATGCCAGTGTACTT/TCTCATCGCAGTCAGGATCATAA  |
| GAPDH               | GGTGGTCTCCTCTGACTTCAACA/GTGGTTCGTTGAGGGCAATG    |
| GATA4               | CATCAAGACGGAGCCTGGCC/TGACTGTCCGGCCAAGACCAG      |
| GATA6               | CCATGACTCCAACCTCCACC/ACGGAGGACGTGACTTCCGGC      |
| GSC                 | TCTCAACCAGCTGCACTGTC/CGTTCTCCGACTCCTCTGAT       |
| I-CAM               | ATGCCCAGACATCTGTGTCC/GGGGTCTCTATGCCCAACAA       |
| integrin $\alpha$ 1 | CCAAACATGTCTTCCACCG/CTGCTGCTGGCTCCTCAC          |
| integrin $\alpha$ 2 | TCACTTGAAGGACCGGAAAA/CTGGTGTAGCGCTCAGTCA        |
| integrin $\alpha$ 3 | GGTTGGTGTAGCCATCGG/CCTCTTCGGCTACTCGGTC          |
| integrin $\alpha$ 4 | TGGCTGTCTGGAAAGTGTGA/AGACGTGCGAACAGCTCC         |
| integrin $\alpha$ 5 | AGGTAGACAGCACCACCCTG/CTCAGTGGAGTTTTACCGGC       |
| integrin $\alpha$ 6 | GTTGGCTCTCTGCAGTGGAA/CCTCTTCGGCTTCTCGCT         |
| integrin $\alpha$ 9 | TGTAGGCTGCTTCAAACACG/GCTGCAGCTGACTTACATGG       |
| integrin $\alpha$ v | TCCAAACCACTGATGGGACT/GTGACTGGTCTTCTACCCGC       |
| integrin $\beta$ 1  | CCTACTTCTGCACGATGTGATG/CCTTTGCTACGGTTGGTTACATT  |

|                    |                                                       |
|--------------------|-------------------------------------------------------|
| integrin $\beta$ 3 | GTGACCTGAAGGAGAATCTGC/CCGGAGTGCAATCCTCTGG             |
| integrin $\beta$ 4 | GCAGCTTCCAAATCACAGAGG/CCAGATCATCGGACATGGAGTT          |
| MIXL1              | CCGAGTCCAGGATCCAGGTA/CTCTGACGCCGAGACTTGG              |
| NANOG              | AGAAGGCCTCAGCACCTAC/GGCCTGATTGTTCCAGGATT              |
| N-CAM              | GGCATTTACAAGTGTGTGGTTAC/TTGGCGCATTCTTGAACATGA         |
| OCT3/4             | CTTGAATCCCGAATGGAAAGGG/GTGTATATCCCAGGGTGATCCTC        |
| PROX1              | TTGACATTGGAGTGAAAAGGACG/TGCTCAGAACCTTGGGGATTC         |
| SOX17              | GTGGACCGCACGGAATTTG/GAGGCCCATCTCAGGCTTG               |
| SOX2               | GGCAGCTACAGCATGATGATGCAGGAGC/CTGGTCATGGAGTTGTACTGCAGG |
| SOX9               | TTTCCAAGACACAAACATGA/AAAGTCCAGTTTCTCGTTGA             |
| T                  | TGCTTCCCTGAGACCCAGTT/GATCACTTCTTTCCTTTGCATCAAG        |
| TO                 | GGCAGCGAAGAAGACAAATC/TCGAACAGAATCCAACCTCCC            |
| $\alpha$ AT        | ACTGTCAACTTCGGGGACAC/CATGCCTAAACGCTTCATCA             |

**Table S5. The amplification efficacy of beta integrin beta1, beta3, and beta4 primers, Related to Figure 1**

|       | slope  | e        |
|-------|--------|----------|
| ITGB1 | -3.367 | 0.981528 |
| ITGB3 | -3.369 | 0.980724 |
| ITGB4 | -3.36  | 0.984354 |



### **Supplemental References**

Schmelzer, E., Zhang, L., Bruce, A., Wauthier, E., Ludlow, J., Yao, H.L., Moss, N., Melhem, A., McClelland, R., Turner, W., et al. (2007). Human hepatic stem cells from fetal and postnatal donors. *J Exp Med* *204*, 1973-1987.

Zhang, L., Theise, N., Chua, M., and Reid, L.M. (2008). The stem cell niche of human livers: symmetry between development and regeneration. *Hepatology* *48*, 1598-1607.
